# Supplementary material
Source: PubMed Central journal article supplement (PMC2754715)
Supplement: NIHMS140385-supplement-Supp_Info.pdf [file NIHMS140385-supplement-Supp_Info.pdf]

## **Supporting Information**

### **Identification and characterization of Kava-derived compounds mediating TNF- $\alpha$ suppression**

Michael P. Pollastri\*<sup>1</sup>, Adrian Whitty,<sup>1</sup> Jamie Cassidy Merrill<sup>2</sup>, Trent D. Ashton,<sup>1</sup> and Salomon Amar.<sup>2</sup>

<sup>1</sup>Boston University Department of Chemistry, 590 Commonwealth Avenue, Boston, MA 02215.

<sup>2</sup>Department of Periodontology and Oral Biology, School of Dental Medicine, Boston University, 650 Albany Street, X343, Boston, MA 02118.

**General compound synthesis and purification details.** All reagents for chemical synthesis were purchased from Aldrich Chemical Company (St. Louis, MO) and were used as received. Chemical reactions were carried out under a nitrogen atmosphere and monitored by thin layer chromatography using Merck 60 F254 precoated silica gel plates (0.25 mm thickness). Analytical LC was performed on a Waters Acquity UPLC with PDA, ELS and SQ detectors. An Acquity UPLC BEH 2.1 x 50 mm 1.7  $\mu$ M C18 column was used for analytical LC.  $^1\text{H}$  NMR spectra were recorded at 400 MHz at ambient temperature with  $\text{CDCl}_3$  as solvent unless otherwise stated.  $^{13}\text{C}$  NMR spectra were recorded at 100.0 MHz at ambient temperature with  $\text{CDCl}_3$  as solvent unless otherwise stated. Chemical shifts are reported in parts per million relative to  $\text{CDCl}_3$  ( $^1\text{H}$ ,  $\delta$  7.24;  $^{13}\text{C}$ ,  $\delta$  77.0). Data for  $^1\text{H}$  NMR are reported as follows: chemical shift, integration, multiplicity (app = apparent, par obsc = partially obscure, ovrlp = overlapping, s = singlet, d = doublet, t = triplet, q = quartet, qt = quintuplet, m = multiplet) and coupling constants are reported as values in hertz. All  $^{13}\text{C}$  NMR spectra were recorded with complete proton decoupling. High-resolution mass spectra were obtained in the Boston University Chemical Instrumentation Center using a Waters Q-TOF mass spectrometer. Flash chromatography was performed on using silica gel 60N of Kanto Chemical C. Int., Tokyo, Japan. Analytical LC was performed on a Waters Acquity UPLC with PDA, ELS and SQ detectors. An Acquity UPLC BEH 2.1 x 50 mm 1.7  $\mu$ M C18 column was used for analytical LC.

**ADME/PK experiments.** In vitro ADME and pharmackinetic analyses were performed at Apredica, Inc (Watertown, MA). Samples were analyzed by LC/MS/MS using either an Agilent 6410 mass spectrometer coupled with an Agilent 1200 HPLC and a CTC PAL chilled autosampler, all controlled by MassHunter software (Agilent), or an ABI2000 mass spectrometer coupled with an Agilent 1100 HPLC and a CTC PAL chilled autosampler, all controlled by Analyst software (ABI). After separation on a C18 reverse phase HPLC column (Agilent, Waters, or equivalent) using an acetonitrile-water gradient system, peaks were analyzed by mass spectrometry (MS) using ESI ionization in MRM mode.

Permeability assay: CaCo-2 cells grown in tissue culture flasks were trypsinized, suspended in medium, and the suspensions were applied to wells of a collagen-coated BioCoat Cell Environment in 24-well format (BD Biosciences) at 24,500 cells per well. The cells were allowed to grow and differentiate for three weeks, feeding at 2-day intervals. For Apical to Basolateral (A->B) permeability, the test agent was added to the apical (A) side and amount of permeation is determined on the basolateral (B) side; for Basolateral to Apical (B>A) permeability, the test agent was added to the B side and the amount of permeation is determined on the A side. The A-side buffer contained 100 PM Lucifer yellow dye, in Transport Buffer (1.98 g/L glucose in 10 mM HEPES, 1x Hank's Balanced Salt Solution) pH 6.5, and the B-side buffer was Transport Buffer, pH 7.4. CaCo-2 cells were incubated with these buffers for 2 h., and the receiver side buffer was removed for analysis by LC/MS/MS. To verify the CaCo-2 cell monolayers are properly formed, aliquots of the cell buffers were analyzed by fluorescence to determine the transport of the impermeable dye Lucifer Yellow.

Plasma stability screen, the test agent was incubated in duplicate with plasma at 37 °C. The reaction contains plasma and 2% DMSO. At the indicated times, an aliquot was removed from each experimental and control reaction and mixed with an three volumes of ice-cold Stop Solution (methanol containing haloperidol, diclofenac, or other internal standard). Stopped reactions were incubated at least ten minutes at -20 °C. The samples were centrifuged to remove precipitated protein, and the supernatants were analyzed by LC/MS/MS to quantitate the remaining parent. Data were converted to % remaining by dividing by the time zero concentration value.

PBS express solubility. Serial dilutions of test agent were prepared in test agent at 100x the final concentration. Test agent solutions were diluted 100-fold into PBS in a 96-well plate and mixed. The absorbance of the PBS-containing plate was measured prior to adding the test agents to determine the background absorbance. After 45 min and 16 hr, the presence of precipitate were then detected by

turbidity absorbance at 540 nm). An absorbance value of greater than (mean + 3x standard deviation of the blank), after subtracting the pre-experiment background, was indicative of turbidity. The solubility limit was reported as the highest experimental concentration with no evidence of turbidity.

Pharmacokinetics. Compounds were assessed for their pharmacokinetic properties in female CD-1 mice. The animals were housed five per cage in a single room, and supplied with water and a commercial rodent diet, ad libitum, for the duration of the study. Compounds were formulated in 5% ethanol/95% PBS buffer and dosed via tail vein (iv) or oral gavage (po). Blood samples were collected by cardiac puncture and placed into tubes containing EDTA as anticoagulant. The samples were centrifuged at 13000 rpm for 5 minutes at 4°C, and plasma was collected and stored at -80°C.

List of representative extracts and natural products from the GNC collection.

Ursodiol  
Nisoldipine  
Gotu Kola  
Flax Seed Oil  
Boswellia  
Haloperidol  
Salsalate  
Zalcitabine  
Acetyl-L-carnitine  
Rutin  
Levaquin  
Cranberry  
Damiana  
Ginger  
Lomotil  
Sporanox  
St. John's Wort  
Alpha Lipoic Acid  
Vitamin B-2  
Kayexalate  
Lindane  
Vitamin B-6

Panthenic Acid  
Natural E 100  
Tranlycypromine sulfate  
Potent Acidophilus  
Cat's Claw  
L. Carnitine  
Nitrofurantoin  
Prilosec (omeprazole)  
Terbinafine  
Chloroxine  
(+/-)-alpha-tocopherol  
Folic Acid  
Calcium Complete  
Glucosamine sulfate  
Sodium cocoyl isethionate  
Boron  
Royal Jelly  
Melatonin 3  
Medrol  
Phytonadione  
Eupatorium perfoliatum  
DHEA  
Dandelion Root  
Alfalfa  
Mitotane  
Crotamiton  
Bentoquatam  
Valerian Root  
Taurine  
Primrose oil  
L. Glutamine  
Black cohosh  
Inosine  
Fo-Ti  
MSM  
L-Tyrosine  
Kava kava root  
Feverfew  
Chromium  
Juniper  
Creatine Monohydrate  
Niacinamide  
Shiitake Mushroom

Goldenseal Root  
Siberian ginseng  
Ashwagandha  
L. Arginine  
Vitamin D  
Blue-Green Algae  
Astragalus  
Eyebright  
Tomato lycopene  
Kelp  
Red clover  
Cayenne  
Cascara sagrada  
Horse Chestnut  
DHA  
Milk Thistle  
Butcher's broom  
Mct  
Kudzu root  
Vitamin b-12  
Borage oil  
Phosphatidyl  
Bromelain  
Devil's Claw Root  
Shark cartilage  
Echinacea root  
Psyllium seed husk  
Lutein  
Vitamin A  
Iron  
L-Phenylalanine  
Vitamin B-1  
Pyruvate fuel  
Yucca  
Horsetail  
Biotin  
Vitamin C  
Vitex  
Pau d'arco  
Bilberry  
L-ornithine  
Guarana  
Green tea

Diet fuel  
Ephedra  
Reishi Mushroom  
Copper  
Ginkgo Biloba  
Aloe vera gel  
Saw palmetto  
Enada NADH  
Odorless garlic  
DMAE  
Red Raspberry  
Beta-Carotene  
Chickweed  
Elderberry extract  
PABA  
Chlorophyll  
Brewer's yeast  
Yohimbized  
5-HTP  
White Ginseng Root  
Chondroitin Sulfate  
Maitake mushroom  
White willow  
Nettle  
Hops  
Cell forte  
Manganese  
Grape seed  
Octacosanol 2000 mcg  
Marshmallow  
Elecampane root  
Yarrow flowers  
Histidine complex  
Mullein  
Colostrum plus  
L-glutamic acid 500mg  
Lemon balm  
Glycine  
Quercetin +c  
Acidophilus  
Turmeric  
Vitamin e-400  
Yellow dock

Lutein  
Pc-55  
L-cysteine  
Butcher's broom  
L-carnitine  
Vitamin b-12  
Niacinamide 100  
Vitamin b-1 300  
L-arginine 500  
Shark cartilage  
White oak bark  
Beta-carotene 15  
Calcium complete  
Ginkgo biloba  
Feverfew  
Pantothenic acid  
Chromium 200  
Chamomile  
Gymnema sylvestre  
Tonalin  
Blue green algae  
Nutraflora fos  
Triple alfalfa  
Gamma-oryzanol 200  
Catnip  
Lobelia  
Aloe vera gel  
Horehound  
Bitter melon powder  
Boron 3  
MSM  
White stevia  
Biotin 300  
Black cohosh  
Schizandra  
Vitamin a 100000  
Vitamin c-500  
Androstenedione  
Artichoke extract  
Boswellia  
Avena sativa  
PS 100  
Folic acid



Copper  
Natural e-100  
Vitamin k  
L- methionine 500 mg  
Arnica montana 30x  
Blue cohosh  
Coltsfoot  
Blueberry leaf  
Barberry  
Angelica  
Tea tree oil  
Chitosan  
Brewer's yeast  
Fenugreek  
Isoflavone caps  
Ashwagandha  
Maitake mushroom  
Devil's claw
